# Supplementary material for: Comprehensive Two-Dimensional Gas Chromatography–Mass Spectrometry as a Tool for the Untargeted Study of Hop and Their Metabolites
Source: MDPI journal article supplement (doi:10.3390/metabo14040237), 2024-04-19

## Supplementary Information

# Comprehensive two-dimensional gas chromatography as a tool for the study of hops and their metabolites

Glaucimar A.P. Resende<sup>1,2</sup>, Michelle S.S. Amaral<sup>1</sup>, Bruno G. Botelho<sup>2</sup> and Philip J. Marriott<sup>1\*</sup>

<sup>1</sup> Australian Centre for Research on Separation Science, School of Chemistry, Monash University, Clayton, 3800 Australia.

<sup>2</sup> Chemistry Department, Universidade Federal de Minas Gerais, Belo Horizonte, 31270-901, Minas Gerais, Brazil.

\*philip.marriott@monash.edu

Metabolites

## Table of contents

|                                                                                                                                                                                                                                                                                                                           |    |
|---------------------------------------------------------------------------------------------------------------------------------------------------------------------------------------------------------------------------------------------------------------------------------------------------------------------------|----|
| <b>Table S1.</b> Hop samples information.....                                                                                                                                                                                                                                                                             | 2  |
| <b>Table S2.</b> Intra-day and inter-day precision of selected peaks by HS-SPME-GC×GC–MS in hops.....                                                                                                                                                                                                                     | 3  |
| <b>Figure S1.</b> A comparison between two chromatographic settings for GC×GC applying HS-SPME for the hop Cascade, where the 1D column is a DB-5ms UI (30 m × 0.25 mm I.D. × 0.25 µm df) and the 2D columns: (A) BPX50(1.0 m × 0.10 mm I.D. × 0.10 µm df) and (B) SupelcoWax10 (1.0 m × 0.10 mm I.D. × 0.10 µm df) ..... | 4  |
| <b>Figure S2.</b> Chromatograms of 4 types of SPME fibers, by their color in Cascade hops via HS-SPME-GC×GC–MS .....                                                                                                                                                                                                      | 5  |
| <b>Table S3.</b> n-Alkanes the series C8-C21 and their respective retention times in the first ( <sup>1</sup> t <sub>R</sub> – DB-5msUI) and second ( <sup>2</sup> t <sub>R</sub> – SUPELCOWAX 10) retention times .....                                                                                                  | 6  |
| <b>Figure S3.</b> Retention time vs n-alkanes series (C <sub>n</sub> ) plot for the calculation of the retention index by Van den Dol and Kratz equation .....                                                                                                                                                            | 6  |
| <b>Figure S4.</b> GC×GC–MS chromatogram for the HS–SPME of the series of n-alkanes (C8-C15) .....                                                                                                                                                                                                                         | 7  |
| <b>Figure S5.</b> GC×GC–MS chromatogram for the HS–SPME of the series of n-alkanes (C16-C21) .....                                                                                                                                                                                                                        | 7  |
| <b>Figure S6.</b> Comparison of chromatograms obtained for the Enigma (ENIG) hop by HS–SPME using (A) GC–MS and (B) GC×GC–MS followed by the identification of selected peaks (C) .....                                                                                                                                   | 8  |
| <b>Figure S7.</b> Comparison of chromatograms obtained for the Zappa (ZAPP) hop by HS-SPME using (A) GC–MS and (B) GC×GC–MS followed by the (C) identification of selected peaks .....                                                                                                                                    | 9  |
| <b>Table S4.</b> Information in the hop composition profile using HS-SPME-GC–MS .....                                                                                                                                                                                                                                     | 10 |
| <b>Figure S8.</b> GC×GC-MS chromatogram for the HS-SPME of Azacca (AZAC) hop.....                                                                                                                                                                                                                                         | 13 |
| <b>Figure S9</b> GC×GC-MS chromatogram for the HS-SPME of Loral (LORA) hop .....                                                                                                                                                                                                                                          | 13 |

**Table S1.** Hop samples information.

|                                    | <b>Azacca<br/>(AZAC)</b>                                                                                                                                   | <b>Cascade<br/>(CASC)</b>                                                        | <b>Enigma™<br/>(ENIG)</b>                              | <b>Loral™<br/>(LORA)</b>           | <b>Zappa<br/>(ZAPP)</b> |
|------------------------------------|------------------------------------------------------------------------------------------------------------------------------------------------------------|----------------------------------------------------------------------------------|--------------------------------------------------------|------------------------------------|-------------------------|
| <i>Class</i>                       | Dual Purpose                                                                                                                                               | Aroma                                                                            | Dual Purpose                                           | Dual Purpose                       | Aroma                   |
| <i>Synonym</i>                     | Azaaca                                                                                                                                                     | -                                                                                | -                                                      | HBC291                             | -                       |
| <i>Purpose</i>                     | Aroma and Bittering                                                                                                                                        | Aroma                                                                            | Aroma and Bittering                                    | Aroma and Bittering                | Aroma                   |
| <i>Heritage</i>                    | Toyomidori and ADHA 94/95                                                                                                                                  | Cross of english fuggle with a male descendant of the Russia variety Serebrianka | Descendant of Swiss Tettnang hop and North America Hop | Daughter of US Glacier & US Nugget | Unknown                 |
| <i>Pellet physical description</i> | T-90 hop pellets (90% weight of the hop cone is maintained), size of the pellet is variable, it has a cylindrical shape and diameter of approximately 6 mm |                                                                                  |                                                        |                                    |                         |
| <i>Consistency</i>                 | A solid pellet which has an easy detection of aroma, and it can be break in powder                                                                         |                                                                                  |                                                        |                                    |                         |
| <i>Pelletising temperature*</i>    | <55 °C                                                                                                                                                     |                                                                                  |                                                        |                                    |                         |
| <i>Solubility in water*</i>        | Insoluble                                                                                                                                                  | Insoluble                                                                        | Insoluble                                              | Insoluble                          | Insoluble               |
| <i>Melting temperature (°C)*</i>   | No data available                                                                                                                                          | No data available                                                                | No data available                                      | No data available                  | No data available       |
| <i>Total oil (mL/100g) *</i>       | 1.6 - 2.5                                                                                                                                                  | 0.8 – 2.5                                                                        | 0.8 – 3.2                                              | 1.5 – 3.4                          | 1.8 – 2.5               |

\*Information from the supplier

**Table S2.** Intra-day and inter-day precision of selected peaks by HS-SPME-GC×GC–MS in hops.

| No. | Compound                        | Intra-day R.S.D (%) (n=5)   |                             |       | Inter-day R.S.D (%) (n=9)   |                             |       |
|-----|---------------------------------|-----------------------------|-----------------------------|-------|-----------------------------|-----------------------------|-------|
|     |                                 | <sup>1</sup> t <sub>R</sub> | <sup>2</sup> t <sub>R</sub> | Area% | <sup>1</sup> t <sub>R</sub> | <sup>2</sup> t <sub>R</sub> | Area% |
| 1   | Isobutyl isobutyrate            | 0.00                        | 0.05                        | 9.63  | 0.54                        | 1.21                        | 12.81 |
| 2   | β-Myrcene                       | 0.00                        | 0.16                        | 3.00  | 0.58                        | 3.17                        | 10.39 |
| 3   | Isobutyl 2-methylbutanoate      | 0.00                        | 0.49                        | 6.73  | 0.54                        | 4.39                        | 14.13 |
| 4   | D-Limonene                      | 0.23                        | 4.30                        | 3.12  | 0.50                        | 5.45                        | 4.43  |
| 5   | Perillen                        | 0.00                        | 0.47                        | 5.86  | 0.44                        | 8.67                        | 8.02  |
| 6   | Linalool                        | 0.00                        | 0.30                        | 5.89  | 0.44                        | 7.71                        | 6.58  |
| 7   | 2-Undecanone                    | 0.00                        | 0.28                        | 1.56  | 0.31                        | 5.48                        | 5.61  |
| 8   | trans-Geranic acid methyl ester | 0.00                        | 0.24                        | 1.85  | 0.30                        | 8.02                        | 7.11  |
| 9   | Copaene                         | 0.00                        | 0.27                        | 3.69  | 0.28                        | 3.89                        | 3.87  |
| 10  | Caryophyllene                   | 0.00                        | 0.69                        | 1.55  | 0.26                        | 5.97                        | 2.27  |
| 11  | α-Bergamotene                   | 0.00                        | 0.39                        | 1.87  | 0.26                        | 3.54                        | 1.65  |
| 12  | (E)-β-Farnesene                 | 0.00                        | 0.27                        | 4.88  | 0.25                        | 5.48                        | 4.16  |
| 13  | γ-Murolene                      | 0.00                        | 0.60                        | 1.78  | 0.25                        | 5.63                        | 2.24  |
| 14  | α-Curcumene                     | 0.00                        | 0.25                        | 2.66  | 0.25                        | 6.68                        | 3.06  |
| 15  | β-Eudesmene                     | 0.00                        | 0.26                        | 5.27  | 0.24                        | 7.00                        | 6.32  |
| 16  | α-Selinene                      | 0.00                        | 0.18                        | 3.18  | 0.24                        | 5.97                        | 4.58  |
| 17  | Geranyl isobutyrate             | 0.00                        | 0.33                        | 1.51  | 0.22                        | 4.41                        | 2.79  |
| 18  | β-Bisabolene                    | 0.00                        | 0.22                        | 4.57  | 0.24                        | 4.80                        | 4.19  |
| 19  | Calamenene                      | 0.00                        | 0.26                        | 2.53  | 0.24                        | 6.68                        | 2.76  |
| 20  | Zonarene                        | 0.00                        | 0.24                        | 8.56  | 0.24                        | 5.08                        | 8.04  |
| 21  | α-Cadinene                      | 0.00                        | 0.45                        | 2.13  | 0.23                        | 6.14                        | 1.87  |
| 22  | Humulene epoxide I              | 0.00                        | 0.29                        | 7.85  | 0.22                        | 8.77                        | 10.15 |

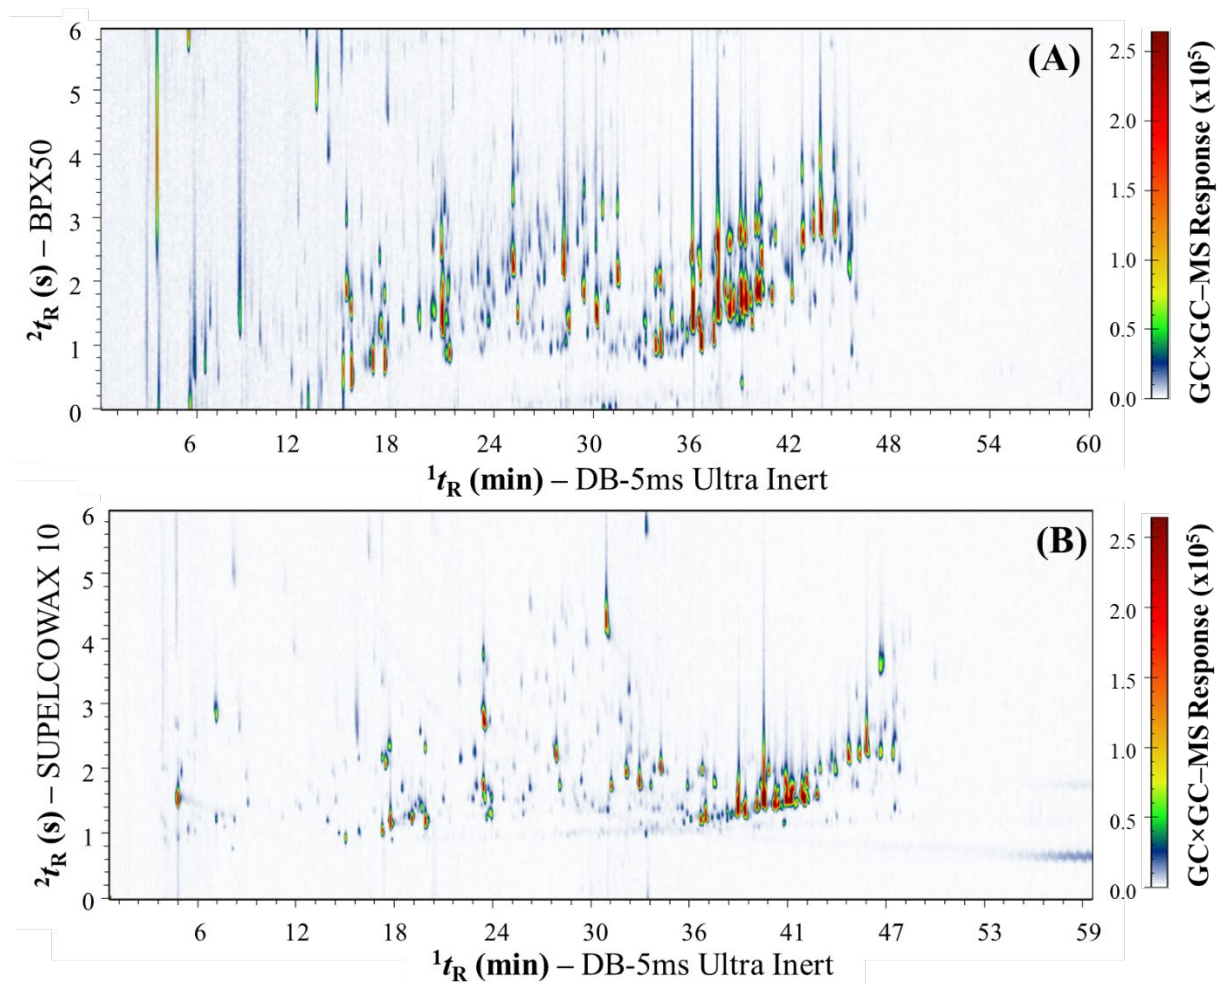

**Figure S1.** A comparison between two chromatographic settings for GC×GC applying HS-SPME for the hop Cascade, where the 1D column is a DB-5ms UI (30 m × 0.25 mm I.D. × 0.25 μm df) and the 2D columns: (A) BPX50(1.0 m × 0.10 mm I.D. × 0.10 μm df) and (B) SupelcoWax10 (1.0 m × 0.10 mm I.D. × 0.10 μm df)

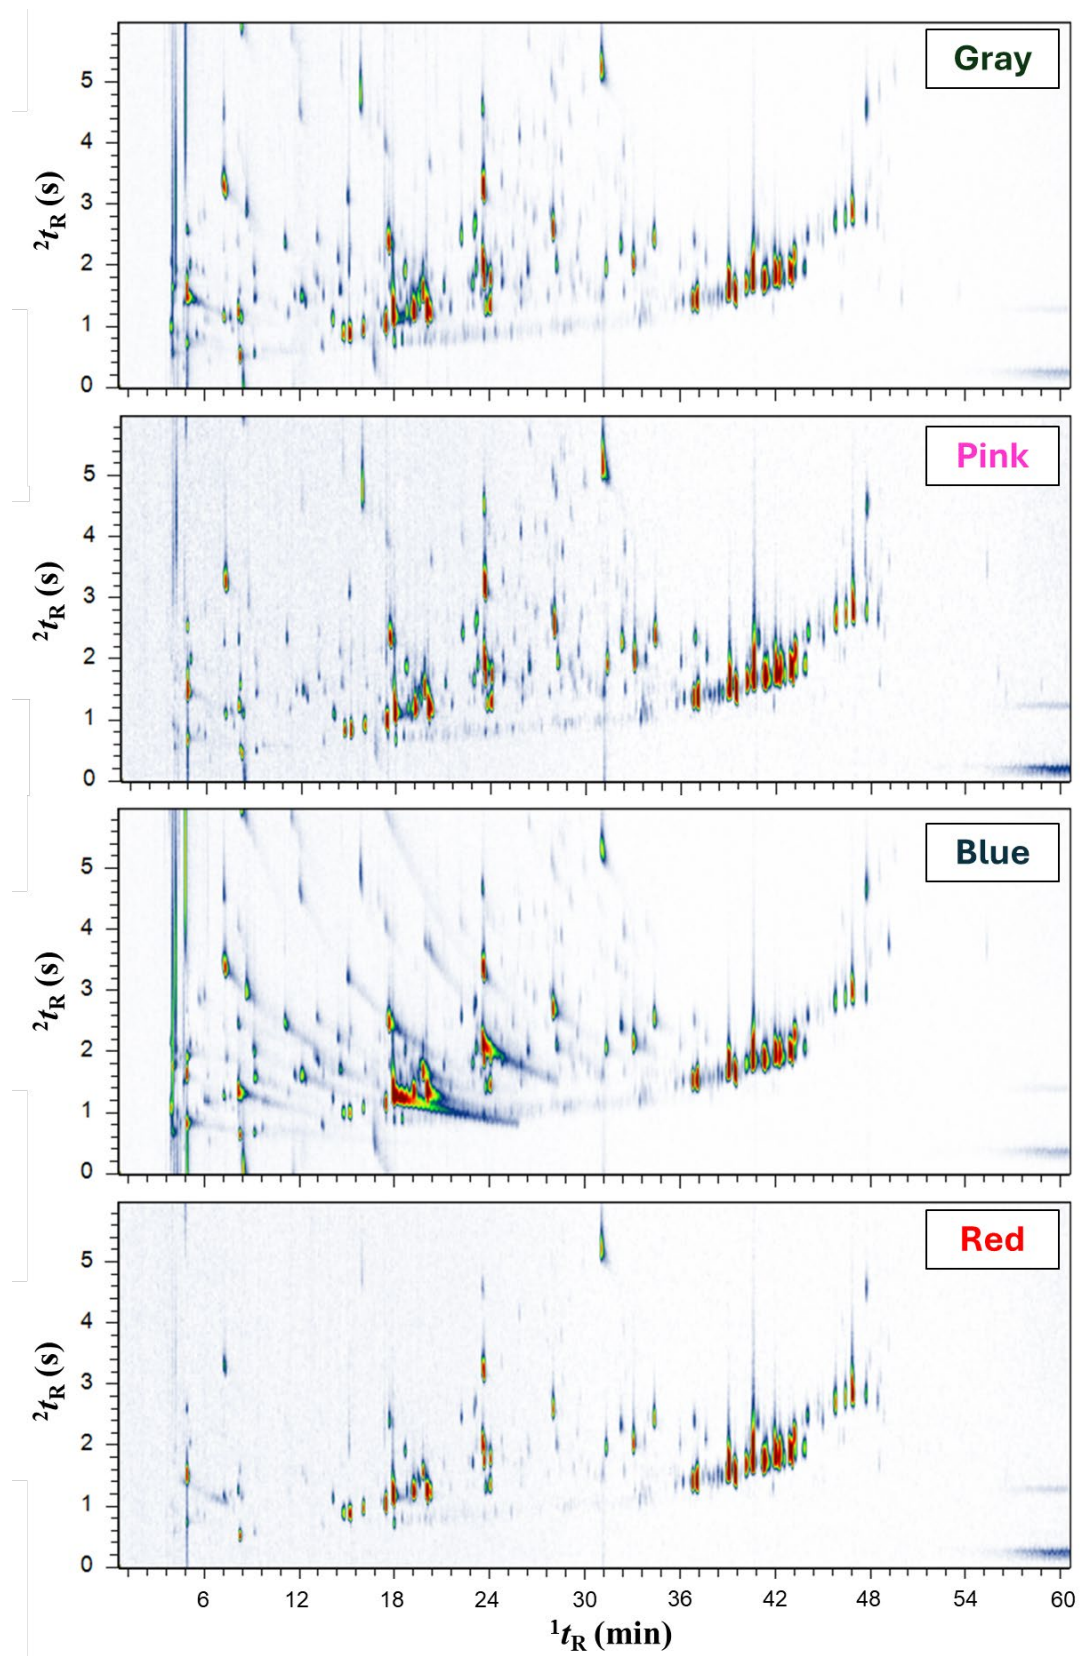

**Figure S2.** Chromatograms of 4 types of SPME fibres, by their color in Cascade hops by HS-SPME-GC×GC-MS.

**Table S3.** n-Alkanes the series C8-C21 and their respective retention times in the first ( $^1t_R$  – DB-5msUI) and second ( $^2t_R$  – SUPELCOWAX 10) retention times

| Alkane | $^1t_R$ (min) | $^2t_R$ (s) | CAS       | Formula |
|--------|---------------|-------------|-----------|---------|
| C8     | 8.86          | 0.36        | 111-65-9  | C8H18   |
| C9     | 13.06         | 0.40        | 111-84-2  | C9H20   |
| C10    | 17.96         | 0.52        | 124-18-5  | C10H22  |
| C11    | 23.06         | 0.57        | 1120-21-4 | C11H24  |
| C12    | 28.06         | 0.64        | 112-40-3  | C12H26  |
| C13    | 32.76         | 0.74        | 629-50-5  | C13H28  |
| C14    | 37.26         | 0.87        | 629-59-4  | C14H30  |
| C15    | 41.46         | 0.88        | 629-62-9  | C15H32  |
| C16    | 45.46         | 1.03        | 544-76-3  | C16H34  |
| C17    | 49.16         | 1.12        | 629-78-7  | C17H36  |
| C18    | 52.76         | 1.23        | 593-45-3  | C18H38  |
| C19    | 55.66         | 1.01        | 629-92-5  | C19H40  |
| C20    | 57.66         | 0.95        | 112-95-8  | C20H42  |
| C21    | 59.56         | 1.02        | 629-94-7  | C21H44  |

**Figure S3.** Retention time vs n-alkanes series (Cn) plot for the calculation of the retention index by Van den Dol and Kratz equation

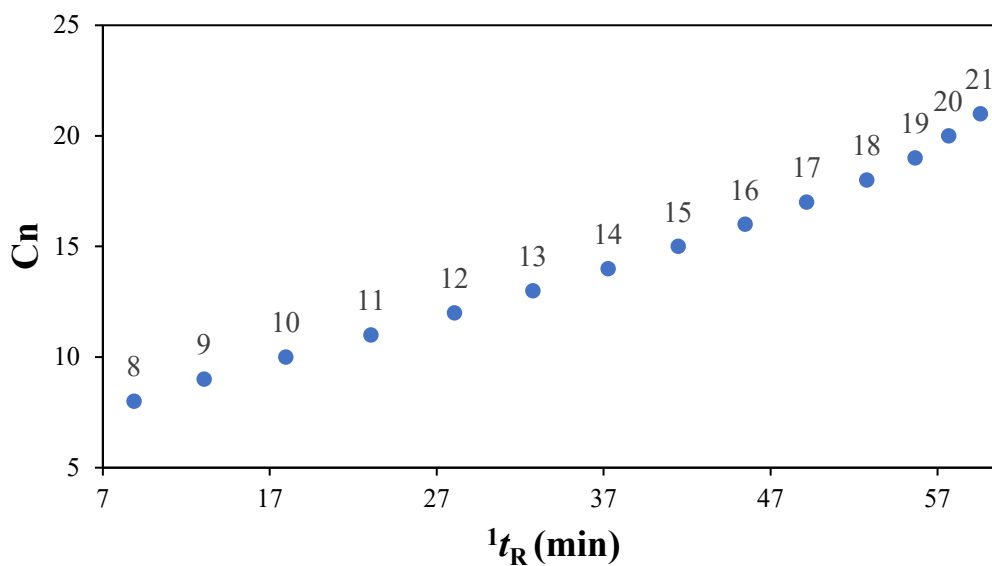

**Figure S4.** GC×GC–MS chromatogram for the HS–SPME of the series of n-alkanes (C8–C15)

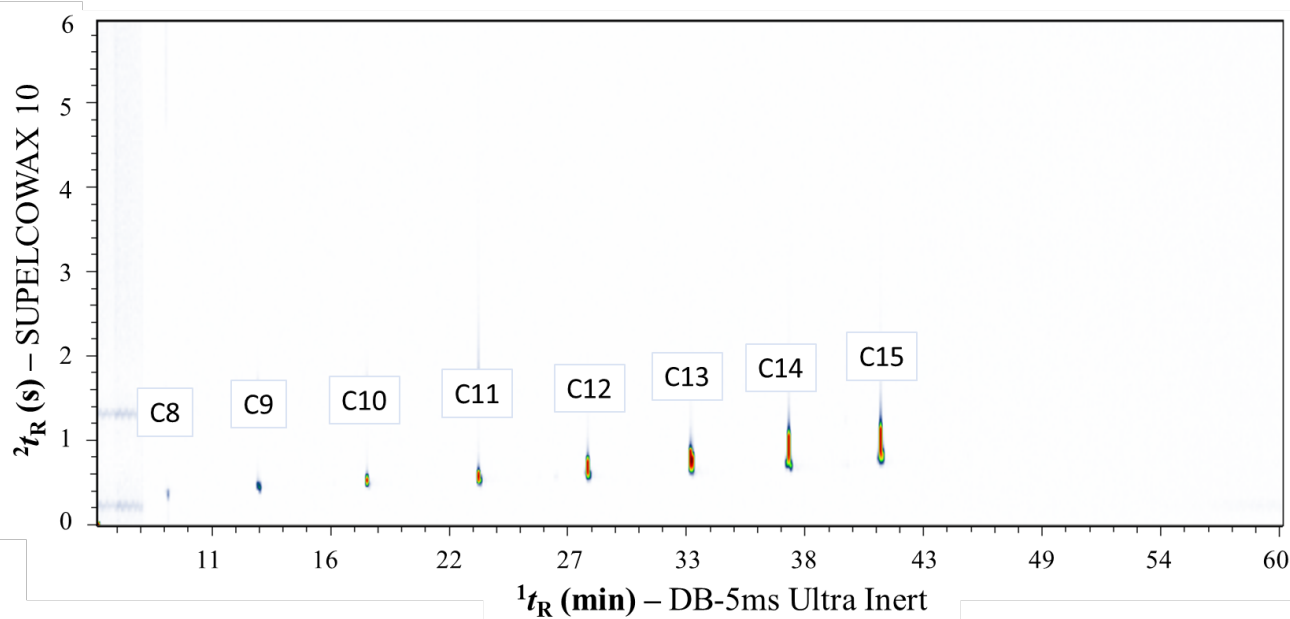

**Figure S5.** GC×GC–MS chromatogram for the HS–SPME of the series of n-alkanes (C16–C21)

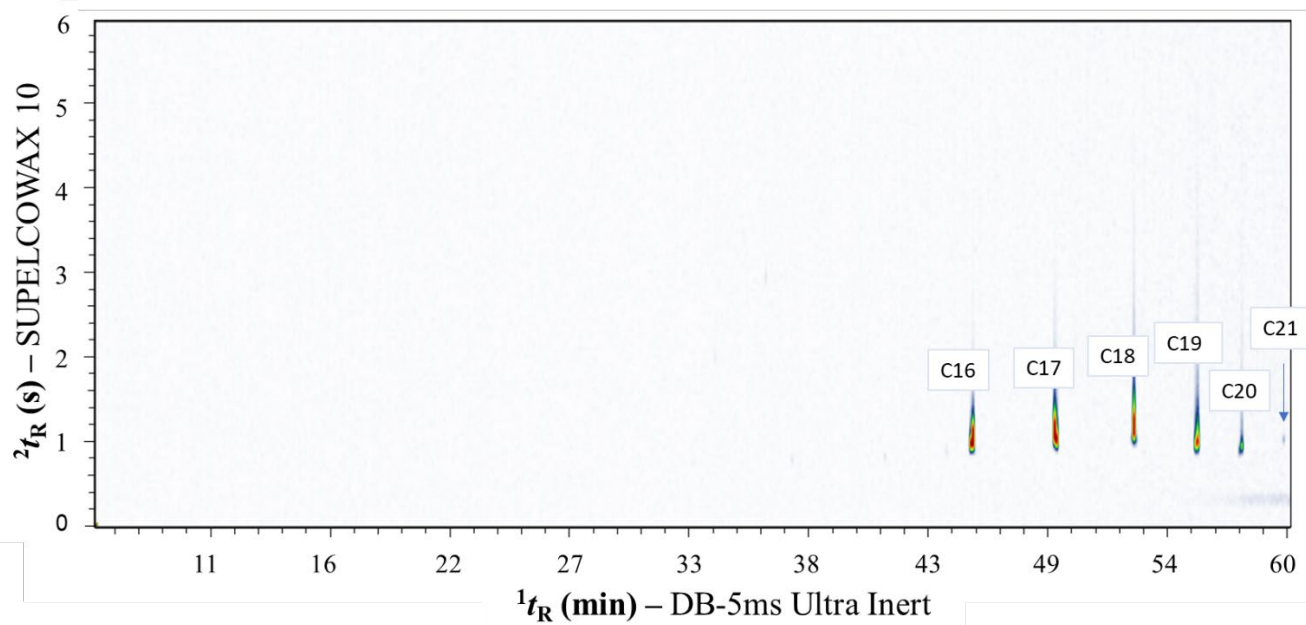

## A comparison of the GC–MS and GC×GC–MS for the hop samples

**Figure S6.** Comparison of chromatograms obtained for the Enigma (ENIG) hop by HS–SPME using (A) GC–MS and (B) GC×GC–MS followed by the identification of selected peaks (C).

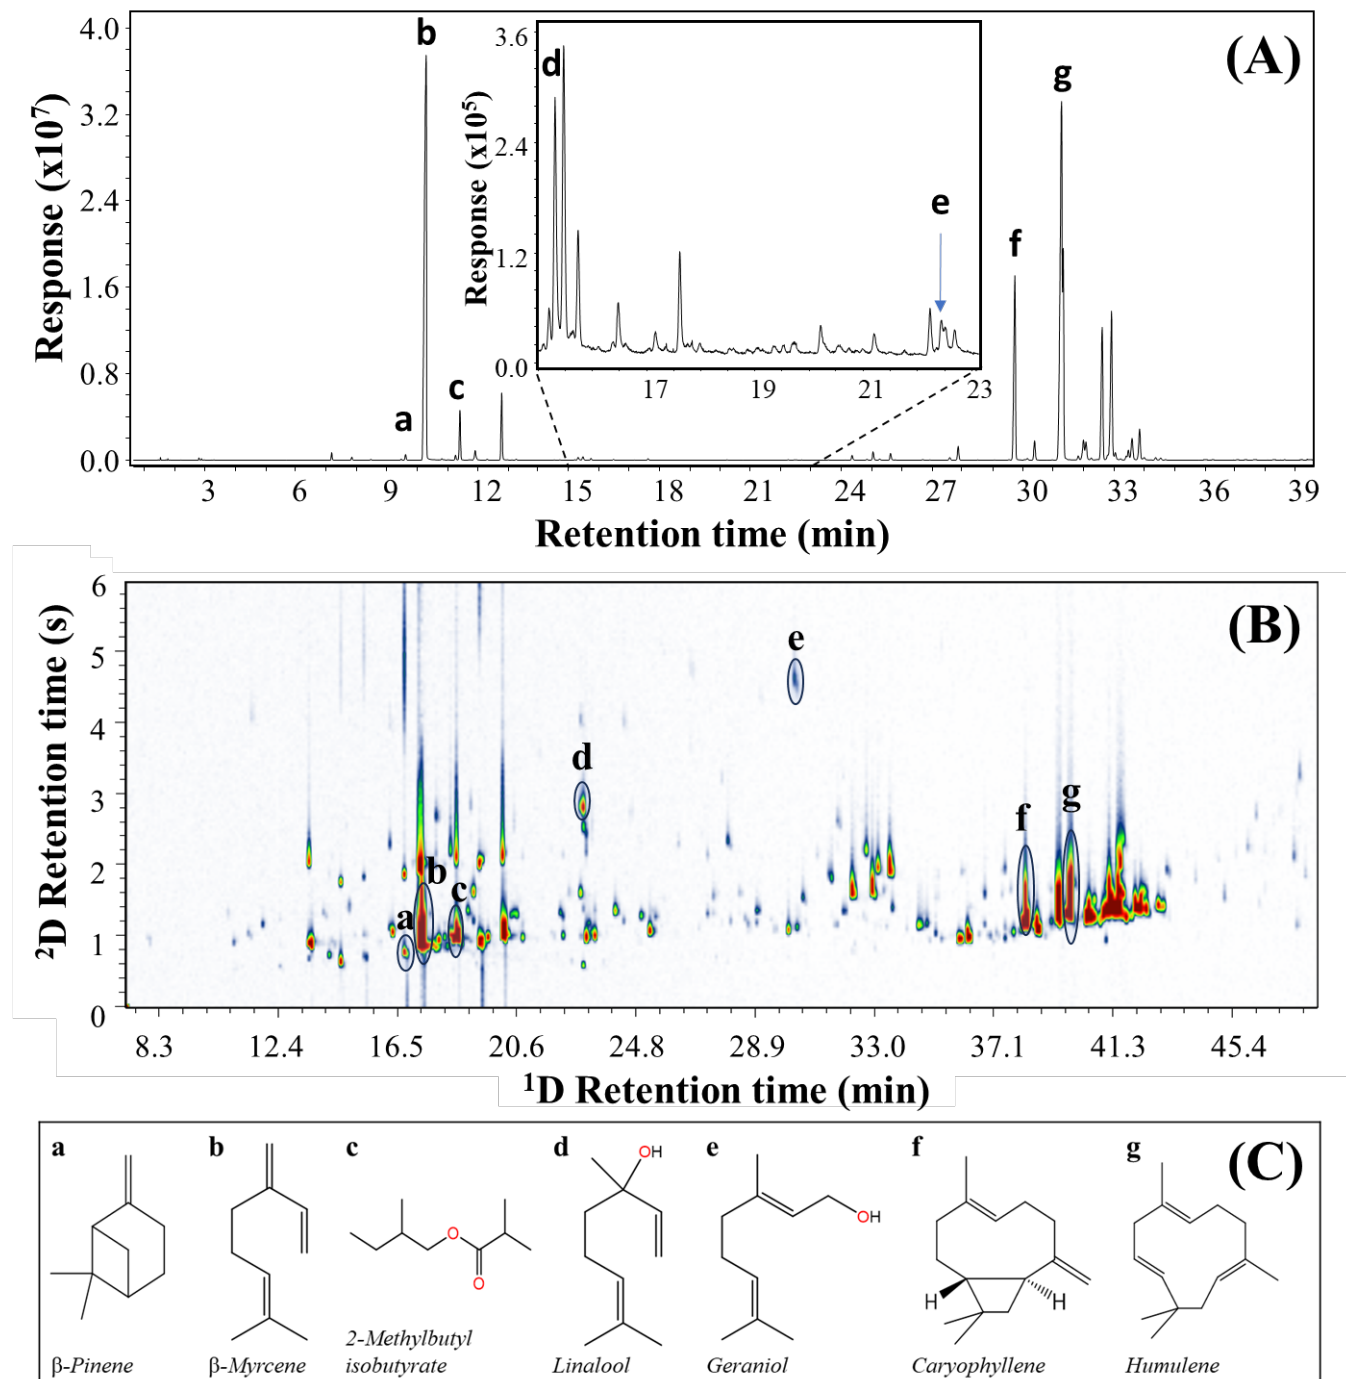



**Figure S7.** Comparison of chromatograms obtained for the Zappa (ZAPP) hop by HS-SPME using (A) GC–MS and (B) GC×GC–MS followed by the (C) identification of selected peaks.

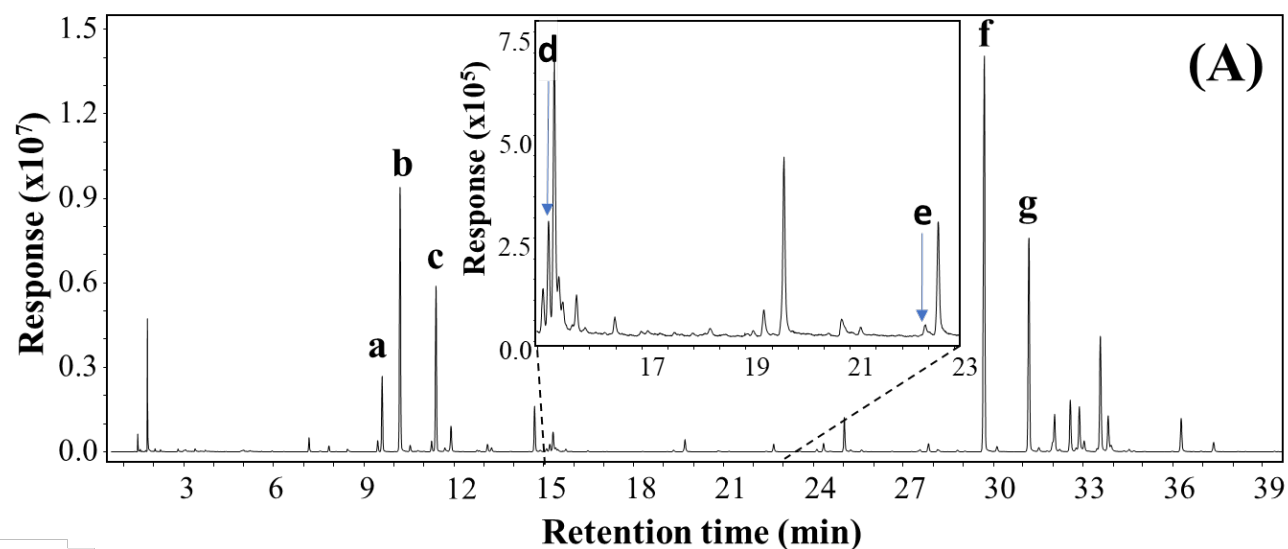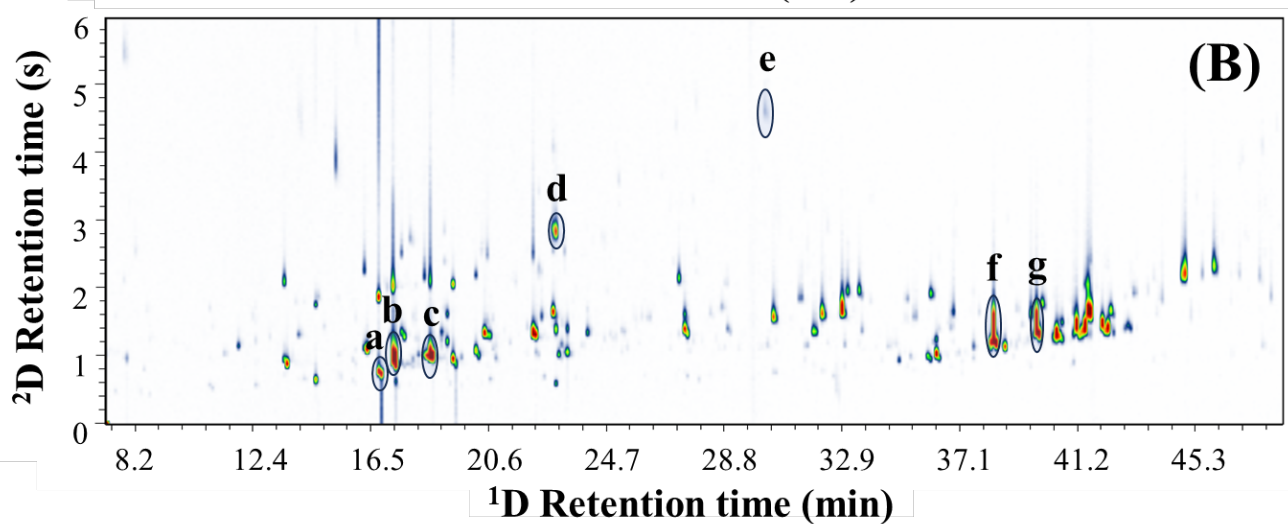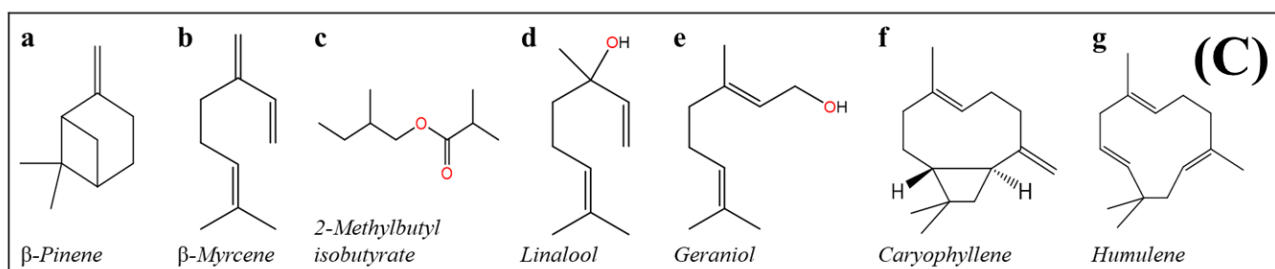

**Table S4.** Information in the hop composition profile using HS-SPME-GC–MS

| No. | <i>t<sub>R</sub></i><br>(min) | Compound*                       | CAS         | Formula  | Lit. RI      | Exp. RI | Relative GC chromatographic area (%) (Mean values $\pm$ SD for n=3) |  |                      |  |                      |  |
|-----|-------------------------------|---------------------------------|-------------|----------|--------------|---------|---------------------------------------------------------------------|--|----------------------|--|----------------------|--|
|     |                               |                                 |             |          |              |         | CASC                                                                |  | ENIG                 |  | ZAPP                 |  |
| 1   | 5.2                           | Propyl isobutyrate              | 644-49-5    | C7H14O2  | 842 $\pm$ 6  | 851     | ND                                                                  |  | 0.0033 $\pm$ 0.0006  |  | 0.1461 $\pm$ 0.0062  |  |
| 2   | 6.0                           | 2-Methylbutyl acetate           | 624-41-9    | C7H14O2  | 880 $\pm$ 3  | 876     | ND                                                                  |  | 0.0046 $\pm$ 0.0009  |  | 0.0498 $\pm$ 0.0053  |  |
| 3   | 7.1                           | Isobutyl isobutyrate            | 97-85-8     | C8H16O2  | 910 $\pm$ 4  | 913     | 0.0214 $\pm$ 0.0018                                                 |  | ND                   |  | 0.5585 $\pm$ 0.0317  |  |
| 4   | 7.8                           | $\alpha$ -Thujene               | 2867-05-2   | C10H16   | 929 $\pm$ 2  | 929     | 0.2195 $\pm$ 0.0085                                                 |  | ND                   |  | 0.2758 $\pm$ 0.0170  |  |
| 5   | 7.8                           | $\alpha$ -Pinene                | 80-56-8     | C10H16   | 937 $\pm$ 3  | 930     | 0.2727 $\pm$ 0.0149                                                 |  | 0.1174 $\pm$ 0.0222  |  | ND                   |  |
| 6   | 8.4                           | 4,4-Dimethyl-2-buten-4-olide    | 20019-64-1  | C6H8O2   | 952 $\pm$ 5  | 944     | 0.1859 $\pm$ 0.0015                                                 |  | ND                   |  | 0.1892 $\pm$ 0.0138  |  |
| 7   | 8.5                           | Camphene                        | 79-92-5     | C10H16   | 952 $\pm$ 2  | 945     | ND                                                                  |  | 0.0339 $\pm$ 0.0069  |  | ND                   |  |
| 8   | 9.5                           | 2-Methylbutyl propionate        | 2438-20-2   | C8H16O2  | 970 $\pm$ 4  | 970     | ND                                                                  |  | 0.0427 $\pm$ 0.0100  |  | 0.5077 $\pm$ 0.0256  |  |
| 9   | 9.6                           | $\beta$ -Pinene                 | 127-91-4    | C10H16   | 979 $\pm$ 2  | 974     | 0.4879 $\pm$ 0.0344                                                 |  | 0.2303 $\pm$ 0.0290  |  | 3.4566 $\pm$ 0.2572  |  |
| 10  | 10.1                          | 6-Methyl-5-heptene-2-one        | 110-93-0    | C8H14O   | 986 $\pm$ 2  | 985     | 0.2180 $\pm$ 0.0152                                                 |  | ND                   |  | ND                   |  |
| 11  | 10.3                          | $\beta$ -Myrcene                | 123-35-3    | C10H16   | 991 $\pm$ 2  | 991     | 4.2778 $\pm$ 0.3663                                                 |  | 29.5075 $\pm$ 2.5200 |  | 13.1833 $\pm$ 1.3945 |  |
| 12  | 10.8                          | Isobutyl 2-methylbutanoate      | 2445-67-2   | C9H18O2  | 1004 $\pm$ 4 | 1003    | ND                                                                  |  | 0.0603 $\pm$ 0.0059  |  | 0.4956 $\pm$ 0.0592  |  |
| 13  | 11.3                          | Isoamyl isobutanoate            | 2050-01-3   | C9H18O2  | 1015 $\pm$ 3 | 1012    | ND                                                                  |  | 0.1858 $\pm$ 0.0172  |  | ND                   |  |
| 14  | 11.4                          | 2-Methylbutyl isobutyrate       | 2445-69-4   | C9H18O2  | 1016 $\pm$ 2 | 1016    | 0.4811 $\pm$ 0.0333                                                 |  | 2.0756 $\pm$ 0.1742  |  | 7.9836 $\pm$ 0.6122  |  |
| 15  | 11.7                          | p-Cymene                        | 99-87-6     | C10H14O  | 1025 $\pm$ 2 | 1022    | 0.4564 $\pm$ 0.0451                                                 |  | 0.0112 $\pm$ 0.0049  |  | 0.2097 $\pm$ 0.0302  |  |
| 16  | 11.9                          | D-Limonene                      | 5989-27-5   | C10H16   | 1030 $\pm$ 2 | 1026    | 1.5083 $\pm$ 0.1623                                                 |  | 0.5335 $\pm$ 0.0425  |  | 1.3000 $\pm$ 0.1141  |  |
| 17  | 12.3                          | $\beta$ -Ocimene                | 13877-91-3  | C10H16   | 1037 $\pm$ 7 | 1035    | ND                                                                  |  | 0.0404 $\pm$ 0.0058  |  | ND                   |  |
| 18  | 12.8                          | trans- $\beta$ -Ocimene         | 3779-61-1   | C10H16   | 1049 $\pm$ 2 | 1045    | ND                                                                  |  | 2.8898 $\pm$ 0.2404  |  | 0.0819 $\pm$ 0.0039  |  |
| 19  | 13.1                          | Prenyl isobutyrate              | 76649-23-5  | C9H16O2  | 1052 $\pm$ 1 | 1052    | ND                                                                  |  | ND                   |  | 0.3941 $\pm$ 0.0150  |  |
| 20  | 13.3                          | $\gamma$ -Terpinene             | 99-85-4     | C10H16   | 1060 $\pm$ 3 | 1057    | 0.0208 $\pm$ 0.0040                                                 |  | ND                   |  | ND                   |  |
| 21  | 13.9                          | cis-Linalool oxide              | 5989-33-3   | C10H18O2 | 1074 $\pm$ 4 | 1069    | 0.0507 $\pm$ 0.0077                                                 |  | ND                   |  | 0.0257 $\pm$ 0.0026  |  |
| 22  | 14.7                          | Methyl 6-methyl heptanoate      | 2519-37-1   | C9H18O2  | NA           | 1086    | ND                                                                  |  | ND                   |  | 2.1707 $\pm$ 0.0722  |  |
| 23  | 15.0                          | 2-Nonanone                      | 821-55-6    | C9H18O   | 1092 $\pm$ 2 | 1092    | 0.0293 $\pm$ 0.0037                                                 |  | ND                   |  | ND                   |  |
| 24  | 15.1                          | Hop ether                       | 344294-72-0 | C10H16O  | NA           | 1095    | 0.1956 $\pm$ 0.0419                                                 |  | 0.0021 $\pm$ 0.0007  |  | 0.1472 $\pm$ 0.0358  |  |
| 25  | 15.2                          | Perillen                        | 539-52-6    | C10H14O  | 1101 $\pm$ 2 | 1097    | 1.1136 $\pm$ 0.1940                                                 |  | 0.0174 $\pm$ 0.0064  |  | 0.3953 $\pm$ 0.0452  |  |
| 26  | 15.3                          | Linalool                        | 78-70-6     | C10H18O  | 1099 $\pm$ 2 | 1099    | 1.2597 $\pm$ 0.2218                                                 |  | 0.1266 $\pm$ 0.0350  |  | 1.0377 $\pm$ 0.0886  |  |
| 27  | 15.5                          | 2-Methylbutyl 2-methylbutanoate | 2445-78-5   | C10H20O2 | 1105 $\pm$ 2 | 1103    | ND                                                                  |  | 0.1464 $\pm$ 0.0235  |  | 0.1099 $\pm$ 0.0132  |  |
| 28  | 15.7                          | 2-Methylbutyl isovalerate       | 2445-77-4   | C10H20O3 | 1107 $\pm$ 2 | 1108    | 0.1321 $\pm$ 0.0258                                                 |  | 0.0471 $\pm$ 0.0084  |  | 0.1106 $\pm$ 0.0082  |  |

|    |      |                                         |             |          |         |      |                  |                  |                  |
|----|------|-----------------------------------------|-------------|----------|---------|------|------------------|------------------|------------------|
| 29 | 16.5 | Methyl octanoate                        | 111-11-5    | C9H18O2  | 1126±2  | 1124 | ND               | 0.0215 ± 0.0163  | 0.0677 ± 0.0061  |
| 30 | 17.2 | (4E,6E)-Allocimene                      | 3016-19-1   | C10H16   | 1144±1  | 1138 | ND               | 0.0106 ± 0.0022  | ND               |
| 31 | 17.6 | Hexyl isobutyrate                       | 2349-07-7   | C10H20O2 | 1150±2  | 1148 | ND               | 0.0448 ± 0.0123  | ND               |
| 32 | 19.7 | Methyl 6-methyloctanoate                | 5129-62-4   | C10H20O2 | 1193±5  | 1192 | ND               | ND               | 0.7060 ± 0.0632  |
| 33 | 21.2 | Methyl nonanoate                        | 1731-84-6   | C10H20O2 | 1225±2  | 1223 | ND               | 0.0108 ± 0.0030  | ND               |
| 34 | 22.2 | Heptyl isobutyrate                      | 2349-13-5   | C11H22O2 | 1247±1  | 1246 | ND               | 0.0190 ± 0.0048  | ND               |
| 35 | 22.4 | Geraniol                                | 106-24-1    | C10H18O  | 1255±3  | 1250 | 1.0079 ± 0.0040  | 0.0224 ± 0.0065  | 0.0516 ± 0.0023  |
| 36 | 23.5 | (Z)-Undec-6-en-2-one                    | 107853-70-3 | C11H20O  | 1274±NA | 1274 | 0.2124 ± 0.0244  | ND               | 0.0634 ± 0.0136  |
| 37 | 24.1 | Methyl 8-methylnonanoate                | 5129-54-4   | C11H22O2 | 1277±NA | 1287 | ND               | ND               | 0.1505 ± 0.0252  |
| 38 | 24.3 | 2-Undecanone                            | 112-12-9    | C11H22O  | 1294±2  | 1292 | 0.6527 ± 0.0519  | 0.1883 ± 0.0511  | 0.4179 ± 0.0661  |
| 39 | 24.8 | 2-Undecanol                             | 1653-30-1   | C11H24O  | 1307±4  | 1302 | ND               | 0.0395 ± 0.0065  | ND               |
| 40 | 25.0 | Methyl (Z)-4-decenoate                  | 1191-02-2   | C11H20O2 | NA      | 1307 | ND               | 0.3158 ± 0.0763  | 1.6317 ± 0.2994  |
| 41 | 25.6 | <i>trans</i> -Geranic acid methyl ester | 1189-09-9   | C11H18O2 | 1324±2  | 1320 | 0.4456 ± 0.0005  | 0.2622 ± 0.0638  | 0.1026 ± 0.0145  |
| 42 | 26.6 | $\alpha$ -Cubebene                      | 17699-14-8  | C15H24   | 1351±2  | 1343 | 0.0306 ± 0.0033  | ND               | 0.0534 ± 0.0043  |
| 43 | 26.7 | n-Octyl Isobutyrate                     | 109-15-9    | C12H24O2 | 1346±3  | 1344 | ND               | 0.0287 ± 0.0074  | ND               |
| 44 | 27.3 | 2-Methyl-1-undecanal                    | 110-41-8    | C12H24O  | 1365±2  | 1358 | 0.0620 ± 0.0098  | ND               | ND               |
| 45 | 27.6 | Ylangene                                | 14912-44-8  | C15H24   | 1372±2  | 1364 | 0.5011 ± 0.0568  | 0.1145 ± 0.0339  | 0.1948 ± 0.0296  |
| 46 | 27.9 | Copaene                                 | 3856-25-5   | C15H25   | 1376±2  | 1371 | 1.8634 ± 0.2077  | 0.5691 ± 0.1031  | 0.5130 ± 0.0783  |
| 47 | 28.5 | (+)-Sativene                            | 3650-28-0   | C15H24   | 1396±0  | 1385 | 0.0429 ± 0.0025  | 0.0113 ± 0.0031  | ND               |
| 48 | 28.8 | 2-Dodecanone                            | 6175-49-1   | C12H24O  | 1396±9  | 1393 | ND               | ND               | 0.1124 ± 0.0201  |
| 49 | 29.1 | Isocaryophyllene                        | 118-65-0    | C15H24   | 1406±3  | 1398 | ND               | ND               | 0.0504 ± 0.0095  |
| 50 | 29.5 | cis- $\alpha$ -Bergamotene              | 18252-46-5  | C15H24   | 1415±3  | 1409 | ND               | 0.0187 ± 0.0060  | ND               |
| 51 | 29.7 | Caryophyllene                           | 87-44-5     | C15H24   | 1419±3  | 1414 | 12.9262 ± 0.4946 | 9.4133 ± 0.2803  | 23.6843 ± 1.2782 |
| 52 | 30.1 | $\beta$ -Copaene                        | 18252-44-3  | C15H24   | 1432±3  | 1424 | 0.3567 ± 0.0608  | 0.0667 ± 0.0145  | 0.3057 ± 0.0437  |
| 53 | 30.4 | $\alpha$ -Bergamotene                   | 13474-59-4  | C15H24   | 1435±3  | 1429 | 1.9188 ± 0.0244  | 0.8366 ± 0.0969  | ND               |
| 54 | 31.3 | Humulene                                | 6753-98-6   | C15H24   | 1454±3  | 1451 | 37.6843 ± 0.8950 | 22.0169 ± 1.0923 | 12.3631 ± 1.1516 |
| 55 | 31.3 | (E)- $\beta$ -Farnesene                 | 18794-84-8  | C15H24   | 1457±2  | 1452 | ND               | 7.8769 ± 0.2327  | ND               |
| 56 | 32.0 | $\gamma$ -Selinene                      | 515-17-3    | C15H24   | 1479±6  | 1468 | ND               | 1.0421 ± 0.0920  | ND               |
| 57 | 32.1 | $\gamma$ -Muurolene                     | 30021-74-0  | C15H24   | 1477±3  | 1470 | 3.6014 ± 0.2510  | 0.8672 ± 0.0684  | 2.6978 ± 0.4025  |
| 58 | 32.6 | $\beta$ -Eudesmene                      | 17066-67-0  | C15H24   | 1486±3  | 1483 | 4.4862 ± 0.1164  | 6.7028 ± 0.3217  | 2.8692 ± 0.4124  |
| 59 | 32.9 | $\alpha$ -Selinene                      | 473-13-2    | C15H24   | 1494±3  | 1490 | 4.0265 ± 0.2012  | 7.9672 ± 0.3473  | 2.6219 ± 0.3578  |
| 60 | 33.0 | $\alpha$ -Muurolene                     | 10208-80-7  | C15H24   | 1499±3  | 1493 | 1.0388 ± 0.2004  | 0.3349 ± 0.0259  | 0.6550 ± 0.0779  |

|    |      |                           |            |          |          |      |        |        |        |        |        |        |                 |
|----|------|---------------------------|------------|----------|----------|------|--------|--------|--------|--------|--------|--------|-----------------|
| 61 | 33.5 | Methyl 3,6-dodecadienoate | 16106-01-7 | C13H22O2 | NA       | 1504 | ND     | 0.4518 | ±      | 0.0331 | 0.1824 | ±      | 0.0228          |
| 62 | 33.6 | β-Bisabolene              | 495-61-4   | C15H24   | 1509±3   | 1506 | 0.1976 | ±      | 0.1127 | ND     | ND     |        |                 |
| 63 | 33.6 | γ-Cadinene                | 39029-41-9 | C15H24   | 1513±2   | 1507 | 2.6860 | ±      | 0.2529 | 1.2033 | ±      | 0.0577 | 7.2685 ± 0.5720 |
| 64 | 33.8 | δ-Cadinene                | 483-76-1   | C15H24   | 1524±2   | 1513 | 2.8384 | ±      | 0.1885 | 1.5243 | ±      | 0.0913 | 1.9931 ± 0.2319 |
| 65 | 33.9 | Calamenene                | 483-77-2   | C15H22   | 1523±5   | 1516 | 0.9033 | ±      | 0.0064 | ND     | 0.3754 | ±      | 0.0489          |
| 66 | 34.0 | Zonarene                  | 41929-05-9 | C15H24   | 1527±N/A | 1517 | ND     |        |        | 0.1664 | ±      | 0.0134 | ND              |
| 67 | 34.4 | Cadine-1,4-diene          | 16728-99-7 | C15H24   | 1533±4   | 1527 | 0.0326 | ±      | 0.0003 | 0.1081 | ±      | 0.0199 | 0.0419 ± 0.0068 |
| 68 | 34.6 | α-Cadinene                | 24406-05-1 | C15H24   | 1538±1   | 1531 | 0.3505 | ±      | 0.0123 | 0.0923 | ±      | 0.0152 | 0.1483 ± 0.0282 |
| 69 | 34.7 | α-Calacorene              | 21391-99-1 | C15H20   | 1542±3   | 1535 | 0.2053 | ±      | 0.0014 | ND     | 0.0583 | ±      | 0.0110          |
| 70 | 36.1 | (Z)-Tetradec-6-en-2-one   | NA         | C14H26O  | 1570±N/A | 1569 | 0.1466 | ±      | 0.0121 | ND     | ND     |        |                 |
| 71 | 36.3 | Caryophyllene oxide       | 1139-30-6  | C15H24O  | 1581±2   | 1575 | 0.5825 | ±      | 0.0260 | ND     | 2.1205 | ±      | 0.1589          |
| 72 | 37.3 | Humulene epoxide I        | 19888-33-6 | C15H24O  | 1604±3   | 1602 | 0.3161 | ±      | 0.0358 | 0.0102 | ±      | 0.0011 | 0.0498 ± 0.0056 |
| 73 | 37.4 | Humulene epoxide II       | 19888-34-7 | C15H24O  | 1606±2   | 1602 | 2.3933 | ±      | 0.0451 | ND     | 0.6809 | ±      | 0.0629          |

Abbreviations:  $t_R$  – Retention time RI – Retention index; CASC –Cascade; ENIG –Enigma; ZAPP – Zappa; NA – Not applicable or not found; ND – Not detected.

\* Tentative identification

<sup>a</sup> Lit. RI, literature retention indexes for the compounds on a semi-standard non-polar column, 5%-phenyl using NIST 11 library,

<sup>b</sup> Exp. RI, experimental retention index calculated by the Van den Dol and Kratz equation.

**Figure S8.** GC×GC–MS chromatogram for the HS-SPME of Azacca (AZAC) hop

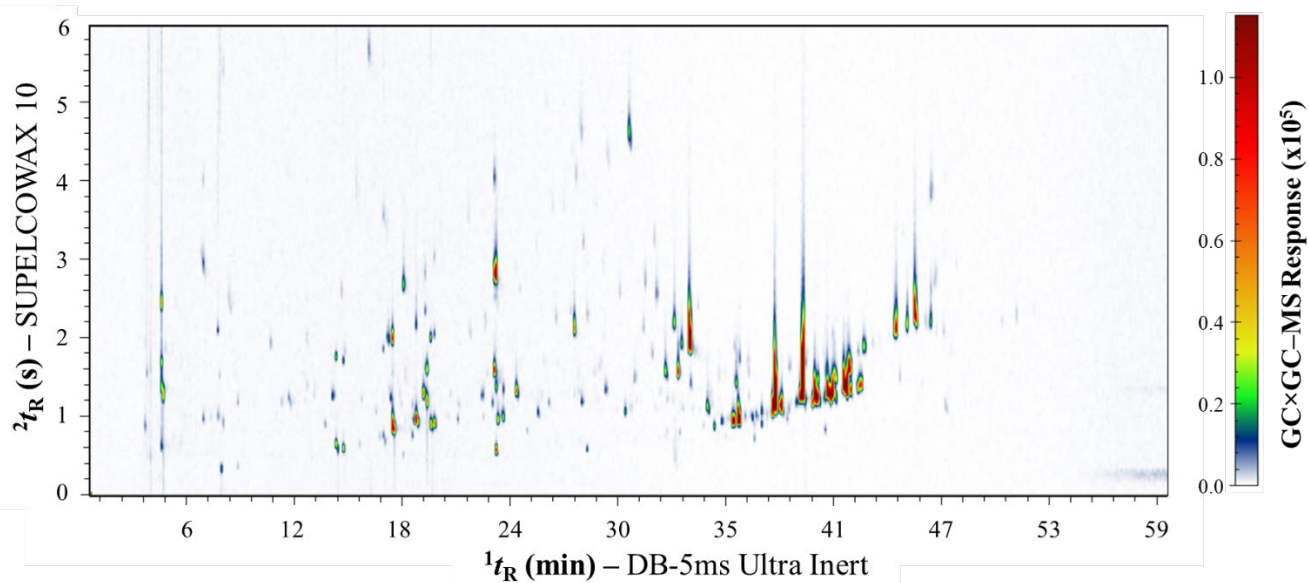

**Figure S9.** GC×GC–MS chromatogram for the HS-SPME of Loral (LORA) hop

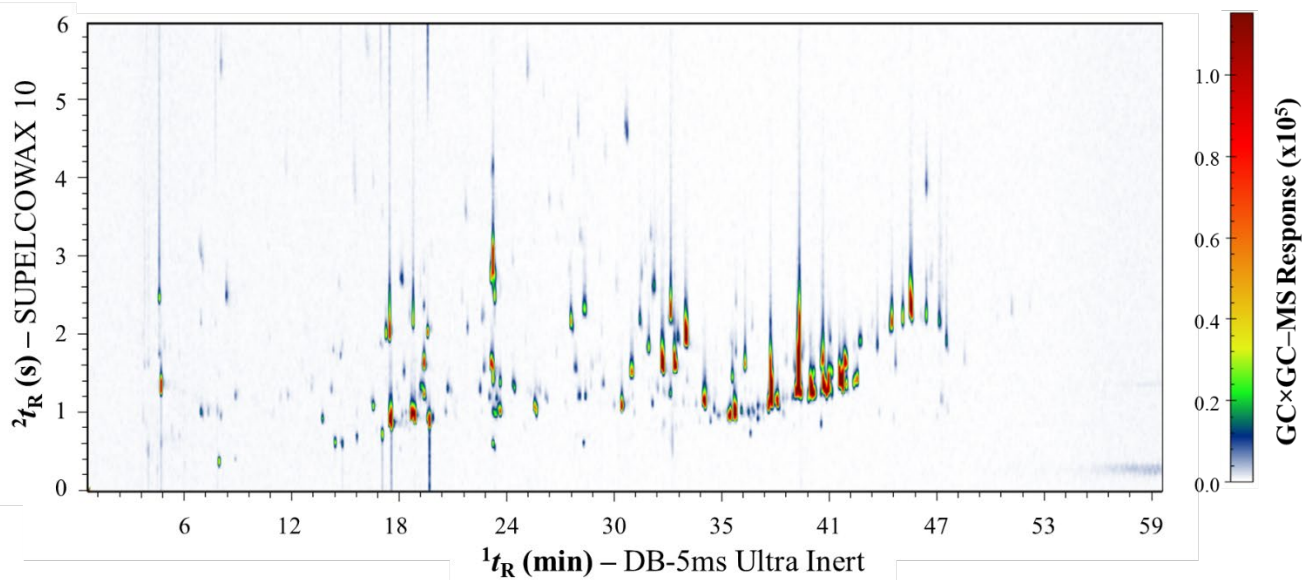

Supplement: s1 [file s1]
